# Supplementary material
Source: PubMed Central journal article supplement (PMC3428777)
Supplement: supp_pp.112.195826_195826Figure_S1.pdf [file supp_pp.112.195826_195826Figure_S1.pdf]

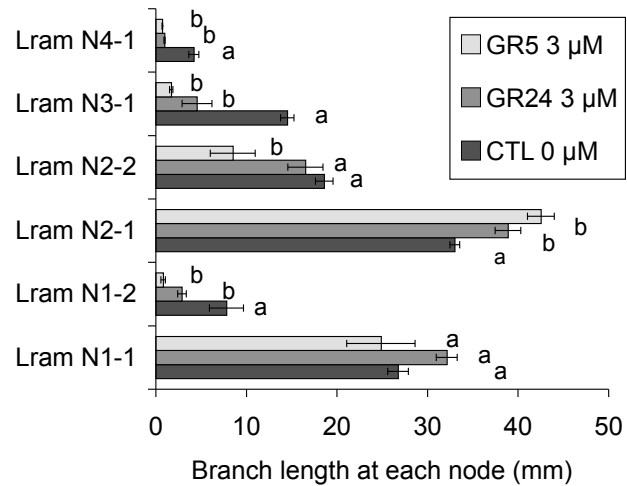

**Figure S1.** Bioassay on bud outgrowth using hydroponic culture; comparison of activity of GR24 and GR5. Axillary bud length at each node of *rml* plants 2 weeks after treatment. Lram Ni-j = ramification length at node i; j=1 means the main branch at this node; j=2 means the second branch at this node when visible (data are means  $\pm$  SE ( $n = 12$ )). CTL 0 = control 0.
