# Supplementary material
Source: PubMed Central journal article supplement (PMC3428777)
Supplement: supp_pp.112.195826_195826Figure_S2.pdf [file supp_pp.112.195826_195826Figure_S2.pdf]

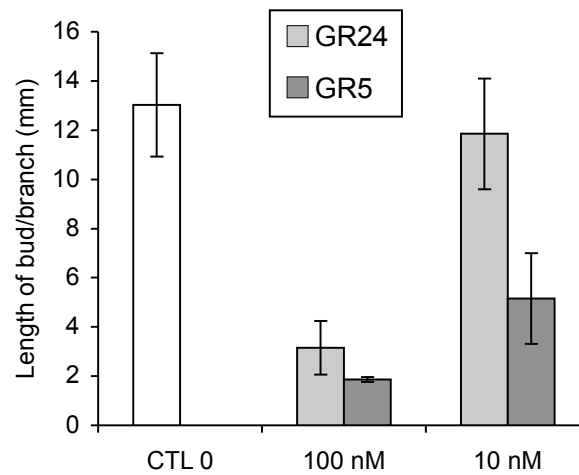

**Figure S2.** Dose dependent activity of the SL analogs GR24 and GR5. Length of axillary bud 10 days after direct application at node 4. Data are means  $\pm$  SE ( $n = 24$ ). CTL 0 = control 0.
