# Supplementary material
Source: PubMed Central journal article supplement (PMC3428777)
Supplement: supp_pp.112.195826_195826Figure_S3.pdf [file supp_pp.112.195826_195826Figure_S3.pdf]

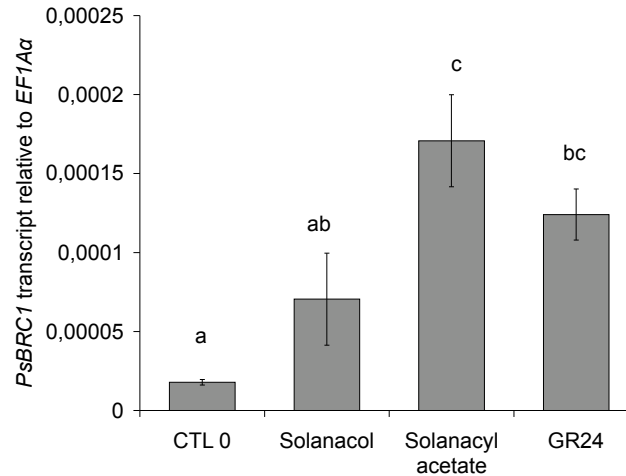

**Figure S3.** Effect of different strigolactones (500 nM) on *PsBRC1* transcript levels in axillary bud at node 3 of *rms1* plants. Plants were treated by direct application on the bud. Buds 6 h after treatment. Data are means  $\pm$  SE ( $n = 3$  pools of 30 plants). Values that have the same letter (a-c) are not significantly different at the  $P = 0.05$  level. CTL 0 = control 0.
