# Supplementary material
Source: PubMed Central journal article supplement (PMC3428777)
Supplement: supp_pp.112.195826_195826Figure_S4.pdf [file supp_pp.112.195826_195826Figure_S4.pdf]

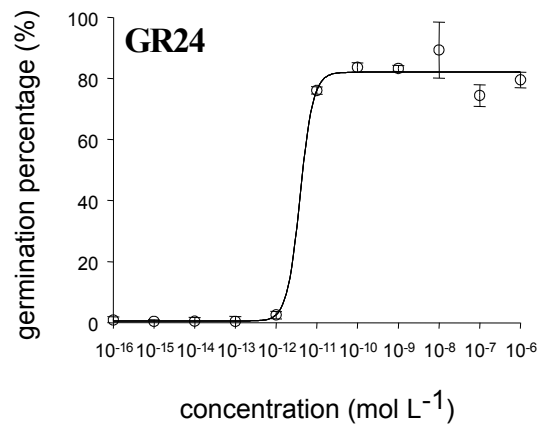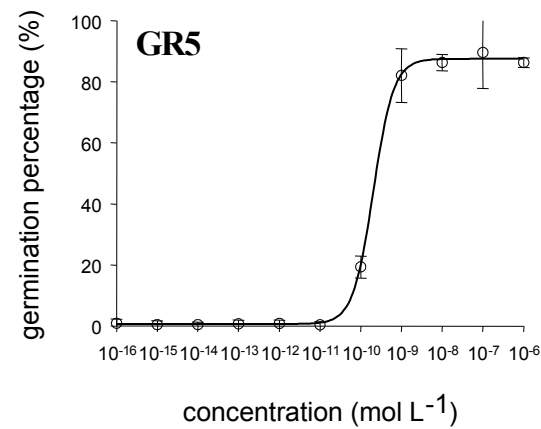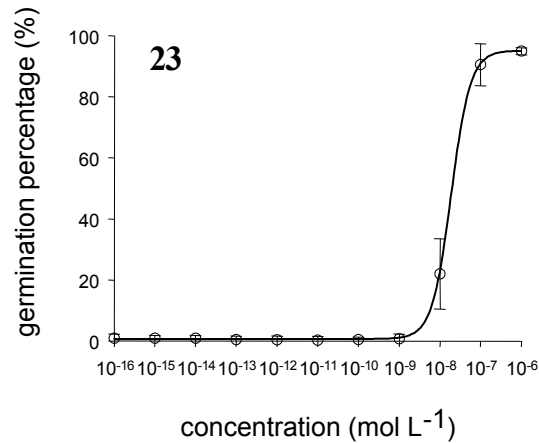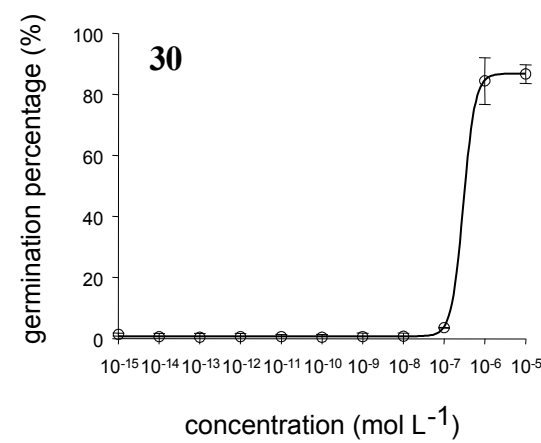

**Figure S4.** Stimulatory activity of GR24, GR5, 23 and 30 toward *P. ramosa* seeds germination.  $G = f(c)$ ,  $G$ : germination percentage ;  $c$ : concentration (mol. L<sup>-1</sup>); dose-reponse curves ( $g = f(c)$ ,  $g$ : germination percentage ;  $c$ : concentration (mol. L<sup>-1</sup>)) modeled with a four parameter logistic curve computed with SigmaPlot® 10.0.
